# Supplementary material for: Socio-Cultural and Economic Valuation of Ecosystem Services Provided by Mediterranean Mountain Agroecosystems
Source: PLoS One. 2014 Jul 18;9(7):e102479. doi: 10.1371/journal.pone.0102479 (PMC4103832; doi:10.1371/journal.pone.0102479)
Supplement: File S2 — Questionnaire (block 1, in Spanish). (PDF) [file pone.0102479.s002.pdf]

# CUESTIONARIO SOBRE AGRICULTURA DE MONTAÑA Y MEDIO AMBIENTE en el PARQUE NATURAL DE LA SIERRA Y CAÑONES DE GUARA

Con el fin de identificar y entender las opiniones de la población residente en el Parque y su área de influencia en temas de **agricultura, ganadería, paisaje y naturaleza**.

Para ser completado por personas adultas (mayores de 18 años)  
residentes en la provincia de Huesca y Zaragoza

**Bloque 1**

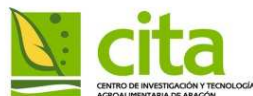

Grupo de Investigación en Sistemas Agro-silvo-pastorales Sostenibles  
Centro de Investigación y Tecnología Agroalimentaria (CITA)  
Avda. Montañana 930, 50059 Zaragoza

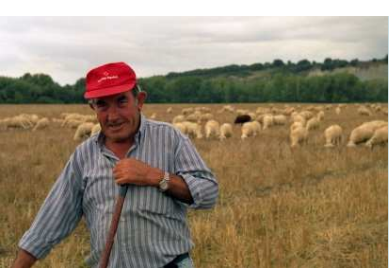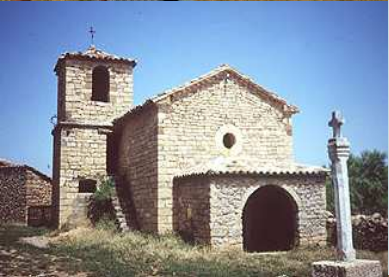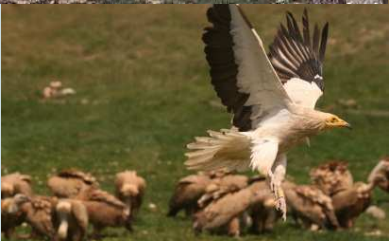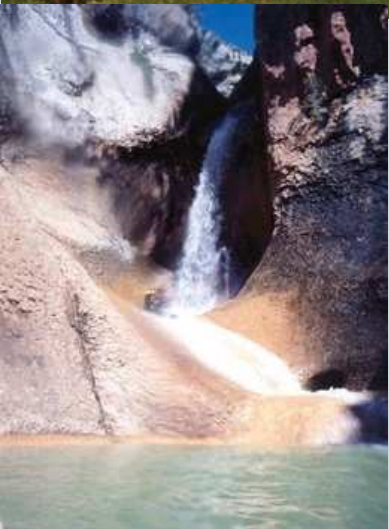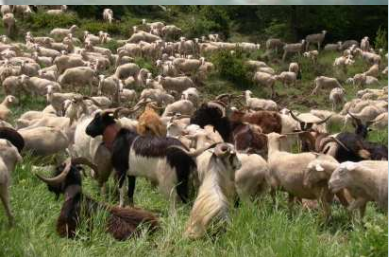

La **agricultura y ganadería** en zonas de montaña, como el Parque Natural de la Sierra y Cañones de Guara en Huesca, cumplen un papel muy importante en la producción de **alimentos de calidad**, contribuyendo a mantener la actividad económica en este **medio rural**.

La actividad agraria resulta también fundamental en el mantenimiento de los **paisajes** tradicionales del Parque, la conservación de gran **diversidad de plantas y animales**, o la prevención de **incendios forestales**.

Sin embargo, este tipo de **agricultura tradicional ha disminuido** o incluso desaparecido completamente en algunas zonas del Parque, por lo que estos **valores naturales** se están viendo **amenazados**.

Este cuestionario está dividido en **3 partes** y trata de **conocer la opinión** de los habitantes del Parque y zonas de influencia (Huesca y Zaragoza) sobre estos temas.

El **objetivo** de la encuesta es orientar mejor las **políticas agrarias y medioambientales** del Gobierno de Aragón y la Unión Europea en este territorio.

Su **participación** nos resulta **muy valiosa**. Le pedimos que dedique unos minutos de su tiempo para completar el cuestionario.

**LA INFORMACIÓN ES ABSOLUTAMENTE CONFIDENCIAL Y NO SE UTILIZARÁ FUERA DE LOS OBJETIVOS DEL TRABAJO, NI SE HARÁN PÚBLICOS LOS DATOS INDIVIDUALES DE LOS PARTICIPANTES.**

Este trabajo forma parte de 2 proyectos de investigación desarrollados por el CITA en colaboración con otros institutos de investigación españoles y europeos, y está financiado por:

- Instituto Nacional de Investigación y Tecnología Agraria y Alimentaria (INIA)
- Comisión Europea (7º Programa Marco de Investigación)

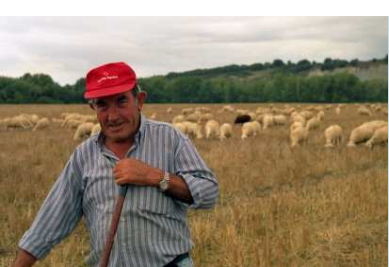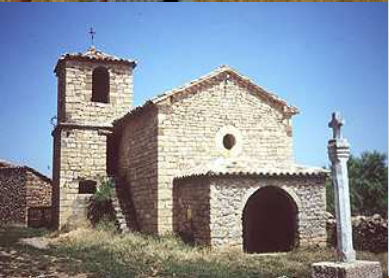

## Parte 1. Grado de acuerdo o desacuerdo

Por favor, marque la casilla que mejor refleje su postura en cada una de las siguientes afirmaciones:

|                                                                                                                     | 1<br>Totalmente en<br>desacuerdo | 2<br>En desacuerdo    | 3<br>Neutral          | 4<br>De acuerdo       | 5<br>Totalmente de<br>acuerdo |  |
|---------------------------------------------------------------------------------------------------------------------|----------------------------------|-----------------------|-----------------------|-----------------------|-------------------------------|--|
|                                                                                                                     | 1                                | 2                     | 3                     | 4                     | 5                             |  |
| 1. Hay que cambiar el modelo de desarrollo económico e integrar la conservación del medio ambiente                  | <input type="radio"/>            | <input type="radio"/> | <input type="radio"/> | <input type="radio"/> | <input type="radio"/>         |  |
| 2. Los supermercados y grandes superficies ofrecen mayores garantías de calidad que las tiendas tradicionales       | <input type="radio"/>            | <input type="radio"/> | <input type="radio"/> | <input type="radio"/> | <input type="radio"/>         |  |
| 3. Si pudiera elegir, preferiría vivir en el campo que en la ciudad                                                 | <input type="radio"/>            | <input type="radio"/> | <input type="radio"/> | <input type="radio"/> | <input type="radio"/>         |  |
| 4. Los recursos naturales están a nuestro servicio y debemos sacar el máximo provecho de ellos                      | <input type="radio"/>            | <input type="radio"/> | <input type="radio"/> | <input type="radio"/> | <input type="radio"/>         |  |
| 5. Las nuevas tecnologías de transformación y envasado de alimentos aumentan la calidad de los productos            | <input type="radio"/>            | <input type="radio"/> | <input type="radio"/> | <input type="radio"/> | <input type="radio"/>         |  |
| 6. Deben acentuarse los esfuerzos para detener el abandono del medio rural                                          | <input type="radio"/>            | <input type="radio"/> | <input type="radio"/> | <input type="radio"/> | <input type="radio"/>         |  |
| 7. Los productos ecológicos, de temporada, y con origen local son una alternativa de consumo más justa y sostenible | <input type="radio"/>            | <input type="radio"/> | <input type="radio"/> | <input type="radio"/> | <input type="radio"/>         |  |
| 8. Las subvenciones agrarias deben concederse a todos los agricultores y ganaderos según su nivel de producción     | <input type="radio"/>            | <input type="radio"/> | <input type="radio"/> | <input type="radio"/> | <input type="radio"/>         |  |
| 9. Es necesario mejorar el control en la aplicación de las políticas agrarias y medioambientales                    | <input type="radio"/>            | <input type="radio"/> | <input type="radio"/> | <input type="radio"/> | <input type="radio"/>         |  |
| 10. La agricultura intensiva (industrializada) es la mejor manera de solucionar el hambre en el mundo               | <input type="radio"/>            | <input type="radio"/> | <input type="radio"/> | <input type="radio"/> | <input type="radio"/>         |  |



## Parte 1. Grado de acuerdo o desacuerdo

Por favor, marque la casilla que mejor refleje su postura en cada una de las siguientes afirmaciones:

| 1                           | 2             | 3       | 4          | 5                        |
|-----------------------------|---------------|---------|------------|--------------------------|
| Totalmente en<br>desacuerdo | En desacuerdo | Neutral | De acuerdo | Totalmente de<br>acuerdo |

| 1 | 2 | 3 | 4 | 5 |
|---|---|---|---|---|
|---|---|---|---|---|

11. Cuando salgo al campo prefiero ver paisajes vírgenes, no intervenidos por el hombre (ej. alta montaña)

|                       |                       |                       |                       |                       |
|-----------------------|-----------------------|-----------------------|-----------------------|-----------------------|
| <input type="radio"/> |
|-----------------------|-----------------------|-----------------------|-----------------------|-----------------------|

12. El Gobierno debe reducir los recursos económicos dedicados a políticas ambientales y dedicarlos a otras políticas

|                       |                       |                       |                       |                       |
|-----------------------|-----------------------|-----------------------|-----------------------|-----------------------|
| <input type="radio"/> |
|-----------------------|-----------------------|-----------------------|-----------------------|-----------------------|

13. La ganadería siempre tiene un impacto ambiental negativo

|                       |                       |                       |                       |                       |
|-----------------------|-----------------------|-----------------------|-----------------------|-----------------------|
| <input type="radio"/> |
|-----------------------|-----------------------|-----------------------|-----------------------|-----------------------|

14. El cambio climático es uno de los problemas más importantes a los que se enfrenta la sociedad actual

|                       |                       |                       |                       |                       |
|-----------------------|-----------------------|-----------------------|-----------------------|-----------------------|
| <input type="radio"/> |
|-----------------------|-----------------------|-----------------------|-----------------------|-----------------------|

15. Los agricultores y ganaderos que se localizan en zonas menos desarrolladas y con altos valores naturales y turísticos deberían recibir mayores subvenciones

|                       |                       |                       |                       |                       |
|-----------------------|-----------------------|-----------------------|-----------------------|-----------------------|
| <input type="radio"/> |
|-----------------------|-----------------------|-----------------------|-----------------------|-----------------------|

16. Deben mantenerse las políticas agrarias y subvenciones actuales puesto que la agricultura es un sector estratégico

|                       |                       |                       |                       |                       |
|-----------------------|-----------------------|-----------------------|-----------------------|-----------------------|
| <input type="radio"/> |
|-----------------------|-----------------------|-----------------------|-----------------------|-----------------------|

17. Los supermercados y grandes superficies ofrecen mayores garantías de seguridad alimentaria que las tiendas tradicionales

|                       |                       |                       |                       |                       |
|-----------------------|-----------------------|-----------------------|-----------------------|-----------------------|
| <input type="radio"/> |
|-----------------------|-----------------------|-----------------------|-----------------------|-----------------------|

18. El crecimiento económico es más importante que la conservación de la naturaleza

|                       |                       |                       |                       |                       |
|-----------------------|-----------------------|-----------------------|-----------------------|-----------------------|
| <input type="radio"/> |
|-----------------------|-----------------------|-----------------------|-----------------------|-----------------------|

19. Deberíamos cambiar nuestra forma de vida: debemos consumir menos

|                       |                       |                       |                       |                       |
|-----------------------|-----------------------|-----------------------|-----------------------|-----------------------|
| <input type="radio"/> |
|-----------------------|-----------------------|-----------------------|-----------------------|-----------------------|

20. Procuro informarme de la manera en que se producen los alimentos y su origen

|                       |                       |                       |                       |                       |
|-----------------------|-----------------------|-----------------------|-----------------------|-----------------------|
| <input type="radio"/> |
|-----------------------|-----------------------|-----------------------|-----------------------|-----------------------|

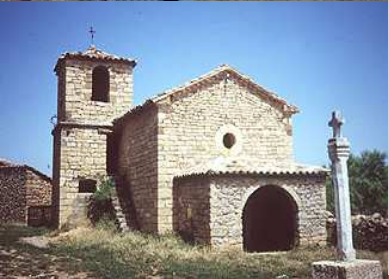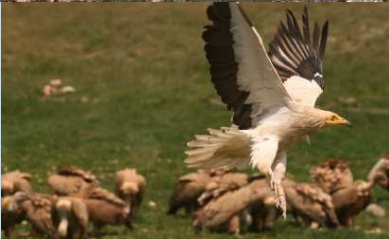

## Parte 2. Cinco fichas (por favor, lea este breve texto con atención antes de contestar)

A continuación le vamos a presentar **5 fichas**.

Cada ficha presenta 3 **políticas agro-ambientales** definidas por una combinación de características en el Parque Natural de Guara: **paisaje tradicional, conservación de especies amenazadas** como el Quebrantahuesos, **prevención de incendios** y disponibilidad de **alimentos de calidad** ligados al territorio.

En cada ficha, la tercera columna corresponde a la **política que se da actualmente** que tiene un coste de 45€ por persona adulta y año. El Gobierno está valorando otras políticas agro-ambientales alternativas en este tipo de espacios. Opciones más caras y más baratas serán consideradas.

El **coste** corresponde a la cantidad que **cada miembro de su hogar** mayor de edad deberá pagar anualmente en su declaración de la renta para financiar la política elegida.

**En cada ficha usted debe elegir la opción (A, B ó C) que prefiere**

Paisaje

clicar sobre la imagen para ampliar

Política A

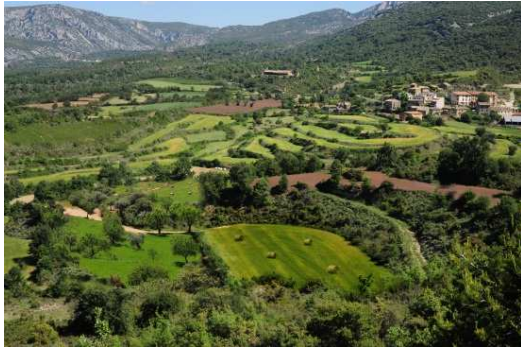

ligera reducción de matorral,  
ligero incremento de praderas y cultivos

Política B

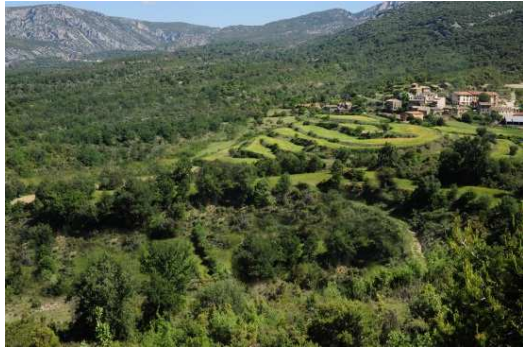

fuerte incremento de matorral,  
reducción de praderas y cultivos

Política ACTUAL

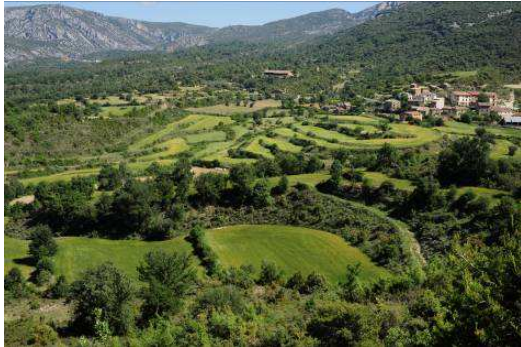

ligero incremento de matorral,  
mantenimiento de praderas y cultivos

Quebrantahuesos

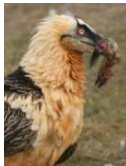

15 parejas

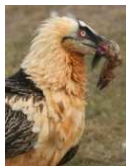

11 parejas

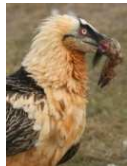

11 parejas

Incendios forestales

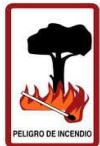

4 incendios  
al año

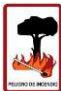

2 incendios  
al año

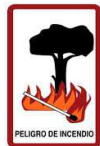

4 incendios  
al año

Productos de calidad  
ligados al territorio

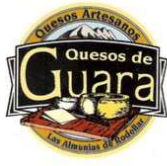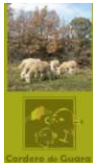

2 productos de  
calidad disponibles  
queso de oveja y carne de  
cordero

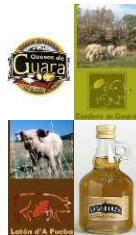

4 productos de  
calidad disponibles  
queso de oveja, carne de  
cordero, carne de cerdo  
extensivo y aceite de oliva

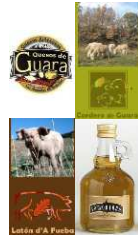

4 productos de  
calidad disponibles  
queso de oveja, carne de  
cordero, carne de cerdo  
extensivo y aceite de oliva

Coste anual

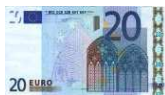

45 euros

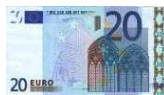

60 euros

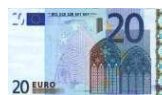

45 euros

OPCION ELEGIDA

☐ A

☐ B

☐ C

Paisaje

clicar sobre la imagen para ampliar

Política A

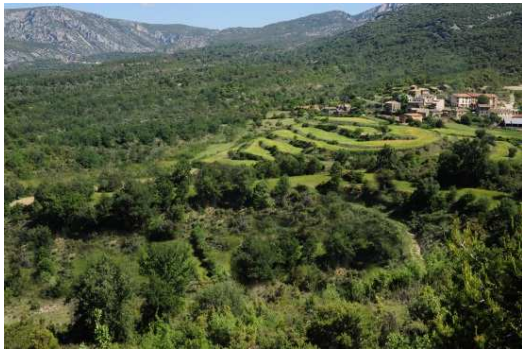

fuerte incremento de matorral,  
reducción de praderas y cultivos

Política B

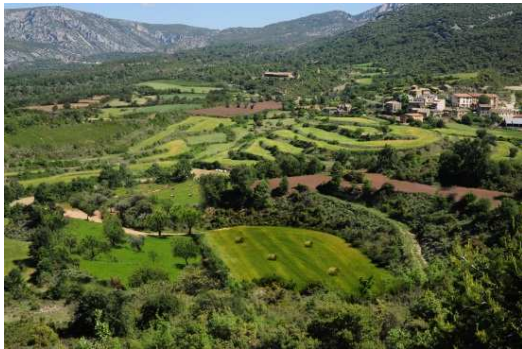

ligera reducción de matorral,  
ligero incremento de praderas y cultivos

Política ACTUAL

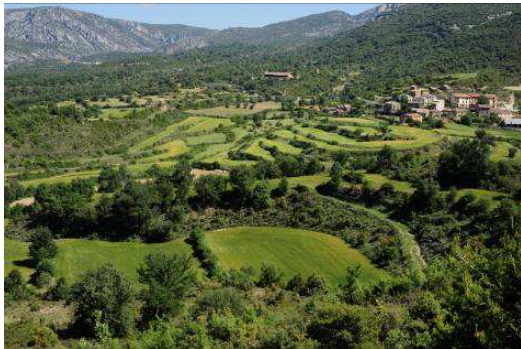

ligero incremento de matorral,  
mantenimiento de praderas y cultivos

Quebrantahuesos

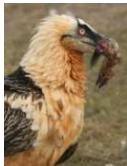

7 parejas

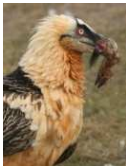

15 parejas



11 parejas

Incendios forestales

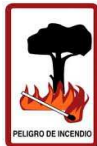

4 incendios  
al año

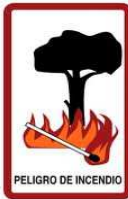

6 incendios  
al año

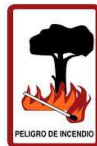

4 incendios  
al año

Productos de calidad  
ligados al territorio

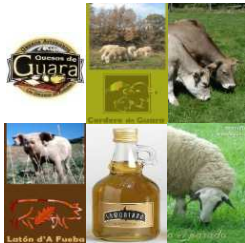

6 productos de  
calidad disponibles  
queso de oveja, carne de  
cordero, carne de cerdo  
extensivo, aceite de oliva,  
carne de novillo extensivo y  
masito (cordero ecológico)

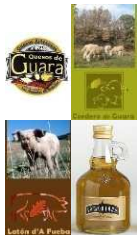

4 productos de  
calidad disponibles  
queso de oveja, carne de  
cordero, carne de cerdo  
extensivo y aceite de oliva

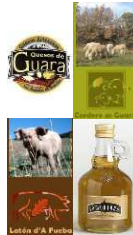

4 productos de  
calidad disponibles  
queso de oveja, carne de  
cordero, carne de cerdo  
extensivo y aceite de oliva

Coste anual

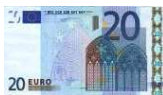

30 euros

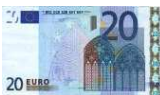

45 euros

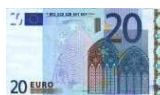

45 euros

OPCION ELEGIDA

☐ A

☐ B

☐ C

Paisaje

clicar sobre la imagen para ampliar

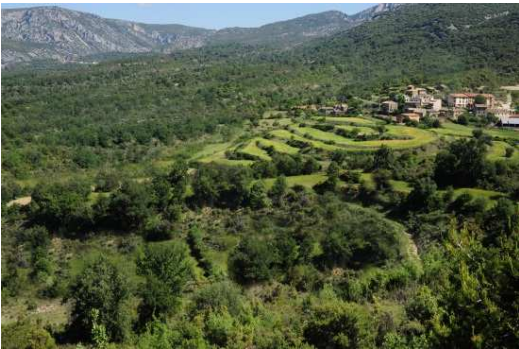

fuerte incremento de matorral,  
reducción de praderas y cultivos



ligera reducción de matorral,  
ligero incremento de praderas y cultivos

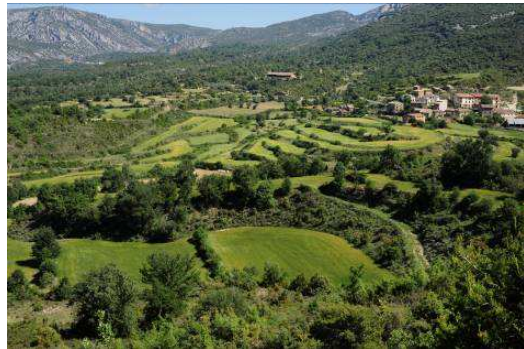

ligero incremento de matorral,  
mantenimiento de praderas y cultivos

Quebrantahuesos

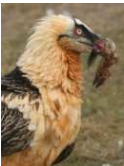

7 parejas

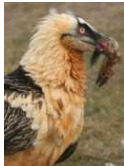

7 parejas

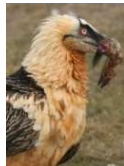

11 parejas

Incendios forestales

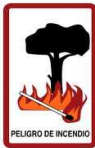

4 incendios  
al año



6 incendios  
al año

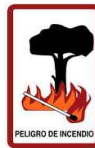

4 incendios  
al año

Productos de calidad  
ligados al territorio

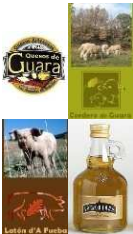

4 productos de  
calidad disponibles  
queso de oveja, carne de  
cordero, carne de cerdo  
extensivo y aceite de oliva

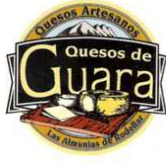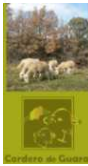

2 productos de  
calidad disponibles  
queso de oveja y carne de  
cordero

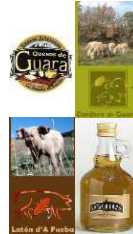

4 productos de  
calidad disponibles  
queso de oveja, carne de  
cordero, carne de cerdo  
extensivo y aceite de oliva

Coste anual

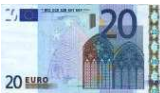

60 euros

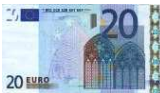

45 euros

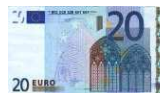

45 euros

OPCION ELEGIDA

☐ A

☐ B

☐ C

Paisaje

clicar sobre la imagen para ampliar

Política A

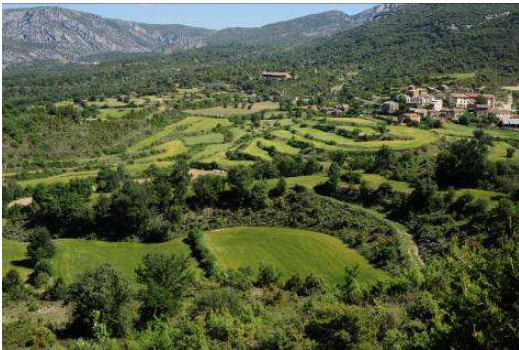

ligero incremento de matorral,  
mantenimiento de praderas y cultivos



15 parejas

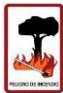

2 incendios  
al año

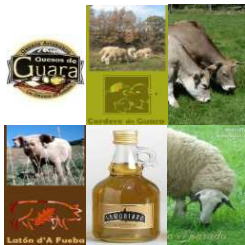

6 productos de  
calidad disponibles  
queso de oveja, carne de  
cordero, carne de cerdo  
extensivo, aceite de oliva,  
carne de novillo extensivo y  
masito (cordero ecológico)

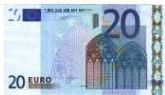

75 euros

Política B

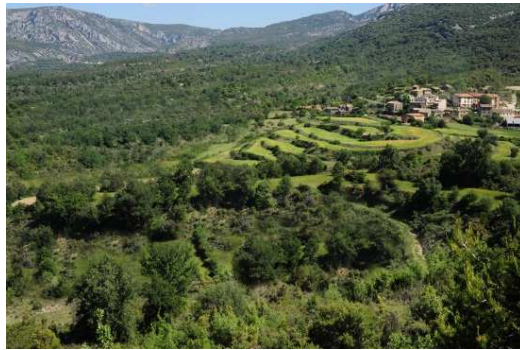

fuerte incremento de matorral,  
reducción de praderas y cultivos

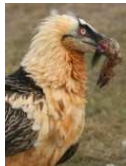

11 parejas

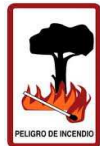

4 incendios  
al año

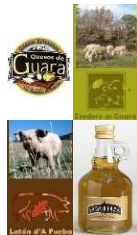

4 productos de  
calidad disponibles  
queso de oveja, carne de  
cordero, carne de cerdo  
extensivo y aceite de oliva

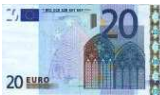

15 euros

Política ACTUAL

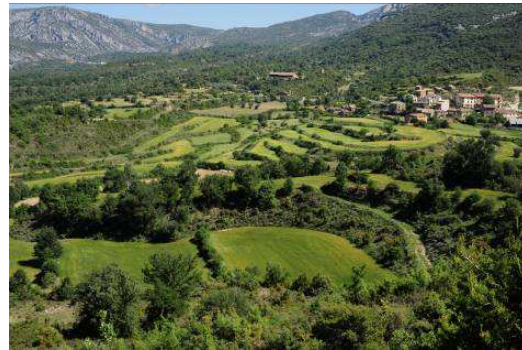

ligero incremento de matorral,  
mantenimiento de praderas y cultivos

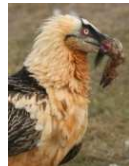

11 parejas

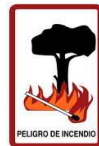

4 incendios  
al año



4 productos de  
calidad disponibles  
queso de oveja, carne de  
cordero, carne de cerdo  
extensivo y aceite de oliva

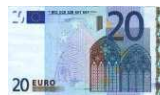

45 euros

Quebrantahuesos

Incendios forestales

Productos de calidad  
ligados al territorio

Coste anual

OPCION ELEGIDA

☐ A

☐ B

☐ C

Paisaje

clicar sobre la imagen para ampliar

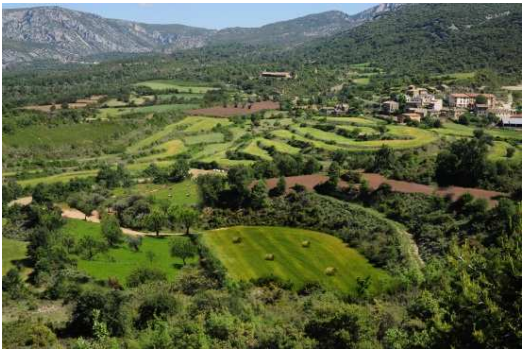

ligera reducción de matorral,  
ligero incremento de praderas y cultivos

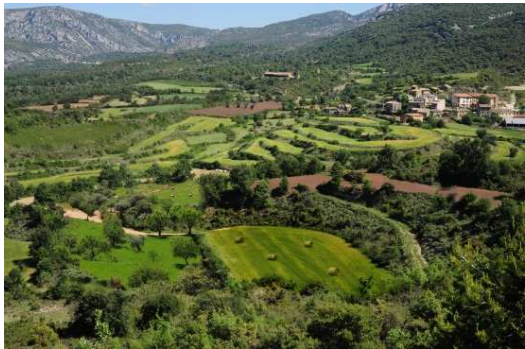

ligera reducción de matorral,  
ligero incremento de praderas y cultivos

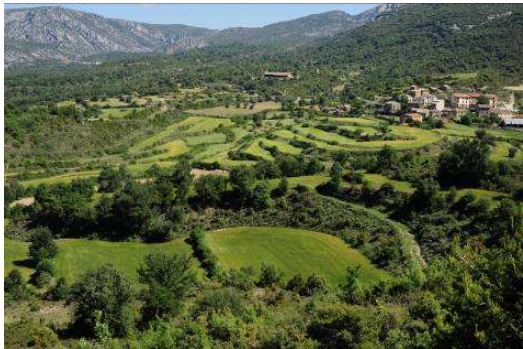

ligero incremento de matorral,  
mantenimiento de praderas y cultivos

Quebrantahuesos



7 parejas

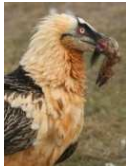

7 parejas



11 parejas

Incendios forestales



2 incendios  
al año

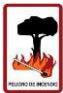

2 incendios  
al año

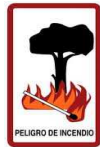

4 incendios  
al año

Productos de calidad  
ligados al territorio

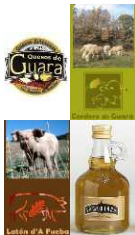

4 productos de  
calidad disponibles  
queso de oveja, carne de  
cordero, carne de cerdo  
extensivo y aceite de oliva

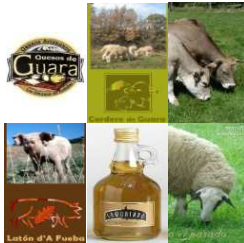

6 productos de  
calidad disponibles  
queso de oveja, carne de  
cordero, carne de cerdo  
extensivo, aceite de oliva,  
carne de novillo extensivo y  
masito (cordero ecológico)

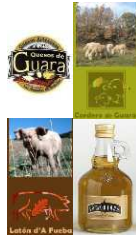

4 productos de  
calidad disponibles  
queso de oveja, carne de  
cordero, carne de cerdo  
extensivo y aceite de oliva

Coste anual

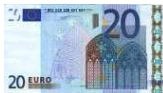

45 euros

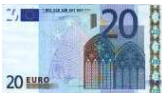

75 euros

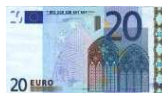

45 euros

OPCION ELEGIDA

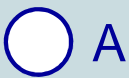

A

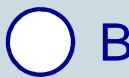

B

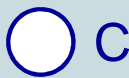

C



## Parte 3. Ahora, algunas preguntas sobre usted...

1. Año de nacimiento
2. Género    Mujer ☐    Hombre ☐
3. ¿Cuántas personas viven en su casa incluyéndole a usted?
4. Lugar de residencia
5. ¿Puede indicarnos su nivel de estudios?  
☐ - Educación primaria o básica  
☐ - Bachiller, formación profesional o similar  
☐ - Formación universitaria
6. ¿Están sus estudios o profesión relacionados con ...?  
- Medio ambiente                      sí ☐                      no ☐  
- Agricultura y ganadería            sí ☐                      no ☐
7. ¿Puede indicarnos el nivel de ingresos brutos de su familia? (todas las personas con ingresos que habitan en su hogar)  
☐ - menos de 700€ al mes  
☐ - entre 700 y 1500€ al mes  
☐ - entre 1500 y 3000€ al mes  
☐ - más de 3000€ al mes
8. ¿Puede indicarnos su profesión o dedicación actual?

Ejemplo: funcionario, parado, ama de casa, estudiante, jubilado, etc.

9. ¿Tiene usted o alguien de su familia actividades agrarias?  
☐ sí    ☐ no
10. ¿Es usted miembro de alguna cooperativa o asociación de consumidores?  
☐ sí    ☐ no
11. ¿Es usted miembro de alguna organización de defensa de la naturaleza?  
☐ sí    ☐ no
12. Si reside fuera del Parque de Guara, ¿cuántas veces lo ha visitado en los últimos 5 años?  
☐ - ninguna  
☐ - 1 o 2 veces  
☐ - de 3 a 5 veces  
☐ - más de 5 veces
13. Si ha visitado el parque alguna vez, ¿cuál fue el motivo principal? (elijan una sola opción)  
☐ - caza  
☐ - senderismo  
☐ - barranquismo/ escalada  
☐ - observar la naturaleza  
☐ - otras (indicar)



Si tiene alguna **sugerencia** adicional sobre cualquiera de los temas tratados en este cuestionario, por favor escríbala aquí:

## Muchas gracias por su participación!

Si quiere contactar con nosotros, o tiene alguna duda o sugerencia, puede dirigirse a:

Raimon Ripoll Tel. 620342982 Correo electrónico: [rripoll@aragon.es](mailto:rripoll@aragon.es)

Tamara Rodríguez Tel. 680796232 Correo electrónico: [trodriquezo@cita-aragon.es](mailto:trodriquezo@cita-aragon.es)
